# Supplementary material for: Multicentre single-arm phase II trial evaluating the safety and effiCacy of Panitumumab and iRinOtecan in NeoRAS Wild-type mEtaStatic colorectal cancer patientS (C-PROWESS trial): study protocol
Source: PubMed Central journal article supplement — BMJ Open. 2022 Sep 1;12(9):e063071. doi: 10.1136/bmjopen-2022-063071 (PMC9438189; doi:10.1136/bmjopen-2022-063071), 2022-09-01
Supplement: bmjopen-2022-063071.draft_revisions.pdf [file bmjopen-2022-063071.draft_revisions.pdf]

# BMJ Open

BMJ Open is committed to open peer review. As part of this commitment we make the peer review history of every article we publish publicly available.

When an article is published we post the peer reviewers' comments and the authors' responses online. We also post the versions of the paper that were used during peer review. These are the versions that the peer review comments apply to.

The versions of the paper that follow are the versions that were submitted during the peer review process. They are not the versions of record or the final published versions. They should not be cited or distributed as the published version of this manuscript.

BMJ Open is an open access journal and the full, final, typeset and author-corrected version of record of the manuscript is available on our site with no access controls, subscription charges or pay-per-view fees (<http://bmjopen.bmj.com>).

If you have any questions on BMJ Open's open peer review process please email [info.bmjopen@bmj.com](mailto:info.bmjopen@bmj.com)

# BMJ Open

## Study protocol for a multicenter single-arm phase II trial evaluating the safety and efficacy of panitumumab and irinotecan in patients with NeORAS wild-type metastatic colorectal cancer (C-PROWESS trial)

|                               |                                                                                                                                                                                                                                                                                                                                                                                                                                                                                                                                                                                                                                                                                                                                                                                                                                                                                                                                                                                                                                                                                                                                                                                                                                                                                                                                                                            |
|-------------------------------|----------------------------------------------------------------------------------------------------------------------------------------------------------------------------------------------------------------------------------------------------------------------------------------------------------------------------------------------------------------------------------------------------------------------------------------------------------------------------------------------------------------------------------------------------------------------------------------------------------------------------------------------------------------------------------------------------------------------------------------------------------------------------------------------------------------------------------------------------------------------------------------------------------------------------------------------------------------------------------------------------------------------------------------------------------------------------------------------------------------------------------------------------------------------------------------------------------------------------------------------------------------------------------------------------------------------------------------------------------------------------|
| Journal:                      | <i>BMJ Open</i>                                                                                                                                                                                                                                                                                                                                                                                                                                                                                                                                                                                                                                                                                                                                                                                                                                                                                                                                                                                                                                                                                                                                                                                                                                                                                                                                                            |
| Manuscript ID                 | bmjopen-2022-063071                                                                                                                                                                                                                                                                                                                                                                                                                                                                                                                                                                                                                                                                                                                                                                                                                                                                                                                                                                                                                                                                                                                                                                                                                                                                                                                                                        |
| Article Type:                 | Protocol                                                                                                                                                                                                                                                                                                                                                                                                                                                                                                                                                                                                                                                                                                                                                                                                                                                                                                                                                                                                                                                                                                                                                                                                                                                                                                                                                                   |
| Date Submitted by the Author: | 21-Mar-2022                                                                                                                                                                                                                                                                                                                                                                                                                                                                                                                                                                                                                                                                                                                                                                                                                                                                                                                                                                                                                                                                                                                                                                                                                                                                                                                                                                |
| Complete List of Authors:     | Osumi, Hiroki; Cancer Institute Hospital Gastroenterology Center, Department of Gastroenterology<br>Ishizuka, Naoki; Cancer Institute Hospital Gastroenterology Center, Department of Clinical Trial Planning and Management<br>Takashima, Atsuo; National Cancer Center Japan, Department of Gastrointestinal Medical Oncology<br>Kumekawa, Yosuke; Saitama Cancer Center, Division of Gastrointestinal Oncology<br>Nakano, Daisuke; Tokyo Metropolitan Cancer and Infectious Diseases Center Komagome Hospital, Department of Surgery<br>Shiozawa, Manabu; Kanagawa Cancer Center, Department of Surgery<br>Denda, Tadamichi; Chiba Cancer Center, Division of Gastroenterology<br>Sawada, Ryoichi; Jikei University Hospital, Division of Gastroenterology and Hepatology<br>Ouchi, Kota; Tohoku University Hospital, Department of Medical Oncology<br>Wakatsuki, Takeru; Cancer Institute Hospital Gastroenterology Center, Department of Gastroenterology<br>Narikazu, Boku; The University of Tokyo, Department of Medical Oncology and General Medicine<br>Kato, K; National Cancer Center Hospital, Department of Gastrointestinal Medical Oncology<br>Yamaguchi, Kensei; Cancer Institute Hospital Gastroenterology Center, Department of Gastroenterology<br>Shinozaki, Eiji; Cancer Institute Hospital Gastroenterology Center, Department of Gastroenterology |
| Keywords:                     | CHEMOTHERAPY, Gastrointestinal tumours < GASTROENTEROLOGY, Gastrointestinal tumours < ONCOLOGY                                                                                                                                                                                                                                                                                                                                                                                                                                                                                                                                                                                                                                                                                                                                                                                                                                                                                                                                                                                                                                                                                                                                                                                                                                                                             |
|                               |                                                                                                                                                                                                                                                                                                                                                                                                                                                                                                                                                                                                                                                                                                                                                                                                                                                                                                                                                                                                                                                                                                                                                                                                                                                                                                                                                                            |

SCHOLARONE™  
Manuscripts

## Study Protocol

### **Study protocol for a multicenter single-arm phase II trial evaluating the safety and efficacy of panitumumab and irinotecan in patients with NeoRAS wild-type metastatic colorectal cancer (C-PROWESS trial)**

Hiroki Osumi<sup>1</sup>, Naoki Ishizuka<sup>2</sup>, Atsuo Takashima<sup>3</sup>, Yosuke Kumekawa<sup>4</sup>, Daisuke Nakano<sup>5</sup>, Manabu Shiozawa<sup>6</sup>, Tadamichi Denda<sup>7</sup>, Ryoichi Sawada<sup>8</sup>, Kota Ouchi<sup>9</sup>, Takeru Wakatsuki<sup>1</sup>, Narikazu Boku<sup>10</sup>, Ken Kato<sup>3</sup>, Kensei, Yamaguchi<sup>1</sup>, Eiji Shinozaki<sup>1</sup>

<sup>1</sup>Department of Gastroenterology, The Cancer Institute Hospital of the Japanese Foundation for Cancer Research, Tokyo, Japan.

<sup>2</sup>Department of Clinical Trial Planning and Management, The Cancer Institute Hospital of the Japanese Foundation for Cancer Research, Tokyo, Japan.

<sup>3</sup>Department of Gastrointestinal Medical Oncology, National Cancer Center Hospital, Tokyo, Japan.

<sup>4</sup>Division of Gastrointestinal Oncology, Saitama Cancer Center, Saitama, Japan.

<sup>5</sup>Department of Surgery, Tokyo Metropolitan Cancer and Infectious Diseases Center Komagome Hospital, Tokyo, Japan.

<sup>6</sup>Department of Surgery, Kanagawa Cancer Center, Yokohama, Japan.

<sup>7</sup>Division of Gastroenterology, Chiba Cancer Center, Chiba, Japan.

<sup>8</sup>Division of Gastroenterology and Hepatology, Department of Internal Medicine, The Jikei University School of Medicine, Tokyo, Japan.

1  
2  
3  
4  
5  
6  
7  
8<sup>9</sup>Department of Medical Oncology, Tohoku University Hospital, Miyagi, Japan.  
9  
10

11  
12<sup>10</sup>Department of Medical Oncology and General Medicine, IMSUT Hospital, Institute  
13 of Medical Science, University of Tokyo, Tokyo, Japan.  
14  
15

16  
17 **Corresponding author:**

18 Eiji Shinozaki, M.D., Ph.D.

19 Department of Gastroenterology, Cancer Institute Hospital, Japanese Foundation  
20 for Cancer Research, 3-8-31 Ariake, Koto-ku, Tokyo 135-8550, Japan

21 Phone: +81-3-3520-0111

22 Fax: +81-3-3570-0515

23 E-mail: eiji.shinozaki@jfcr.or.jp  
24  
25  
26  
27

28 Word count = 1207 (excluding title page, abstract, references, and figures)  
29  
30  
31  
32  
33  
34  
35  
36  
37  
38  
39  
40  
41  
42  
43  
44  
45  
46  
47  
48  
49  
50  
51  
52  
53  
54  
55  
56  
57  
58  
59  
60

## ABSTRACT

**Introduction:** A new concept of “NeoRAS wild-type (WT)” which means conversion of RAS status from RAS mutant to RAS WT after the treatment has been reported. Previous observational and proof-of-concept studies have demonstrated the efficacy of epidermal growth factor receptor inhibitors in patients with NeoRAS WT metastatic colorectal cancer (mCRC). Moreover, post hoc biomarker analyses of these studies have suggested that not only the RAS status in the circulating tumor DNA (ctDNA) but also other gene mutational status may be useful as biomarkers of epidermal growth factor receptor inhibitors for NeoRAS WT mCRC.

**Methods and analysis:** This trial is a multicenter, single-arm phase II trial to assess the efficacy and safety of panitumumab plus irinotecan therapy for NeoRAS mCRC patients. The key eligibility criteria include RAS mutant mCRC initially proven in tumor tissue refractory or intolerant to fluoropyrimidine, oxaliplatin, and irinotecan; RAS WT in ctDNA (defined as plasma mutant allele frequencies of all RAS  $\leq 0.1\%$ ) within 28 days prior to enrollment; and Eastern Cooperative Oncology Group performance status  $\leq 2$ . The primary endpoint is a response rate. The target sample size is 30 patients. Biomarker analyses are planned to be performed using next-generation sequencing-based ctDNA analysis.

**Ethics and dissemination:** This study was approved by the certified review board of national cancer center hospital. Results of this study will be submitted for publication in a peer-reviewed journal.

**Trial registration:** jRCT, s031210565. Registered date, January 20, 2022.

**Keywords:** Metastatic colorectal cancer, Circulating tumor DNA, Liquid biopsy, NeoRAS, EGFR inhibitor

### Strengths and limitations of this study

- The C-PROWESS trial is a prospective multicenter, single-arm phase II trial.
- The trial is designed to assess the efficacy and safety of panitumumab plus irinotecan therapy in patients with NeoRAS; however, no comparator is a limitation.

- Translational Research of biomarkers using liquid biopsies at baseline and after discontinuation of the treatment is planned to be performed protocol.

For peer review only

## INTRODUCTION

RAS mutations (MTs) induce the activation of the protein kinase pathway and promote carcinogenesis and cancer growth.[1] Patients with RAS MT metastatic colorectal cancer (mCRC) have a poorer prognosis than those with RAS wild-type (WT) mCRC.[2, 3] Epidermal growth factor receptor (EGFR) inhibitors (i.e., cetuximab and panitumumab), which are key drugs for mCRC, are ineffective for patients with RAS MT mCRC (KRAS/NRAS exons 2, 3, and 4).[4-10] Therefore, more treatment options for patients with RAS-MT mCRC are warranted clinically.

International guidelines recommend RAS genetic testing prior to the administration of an EGFR inhibitor in patients with mCRC.[11-13] Repeat biopsies are not performed in routine clinical practice to monitor the RAS MT status,[11-13]; the consistency of the RAS MT status before and after chemotherapy remains unclear.

There have been some reports that RAS MT observed at the initial diagnosis converted to a RAS WT after treatment.[14] These cases have been called as “Neo RAS WT” mCRC.[14] The incidence of Neo RAS WT mCRC has been reported to range from 10.7% to 40% when assessed in tumor tissue samples,[15, 16] and from 18.8% to 83.3% in the circulating tumor DNA (ctDNA).[17-23]

There have been several reports of the use of EGFR inhibitors in patients with Neo RAS WT. Mohamed et al., in a proof-of-concept study of EGFR inhibitors in patients with Neo RAS WT,[23] reported that the objective response rate was 55.6% and progression-free survival (PFS) was 9 months in Neo RAS WT mCRC patients treated with fluorouracil, folinic acid, irinotecan, and cetuximab.[23] This result suggested that EGFR inhibitors may be effective in Neo RAS WT mCRC patients. Although retrospective analyses and proof-of-concept studies have indicated the potential efficacy of EGFR inhibitors in NeoRAS WT mCRC,[14, 23] the safety and efficacy have not been validated prospectively. Furthermore, the definition of NeoRAS WT mCRC has not been established.

Therefore, this trial will evaluate the efficacy of panitumumab and irinotecan in NeoRAS WT mCRC patients confirmed in ctDNA after prior treatment.

## METHODS AND ANALYSIS

### Trial design

1  
2  
3  
4  
5 The C-PROWESS trial is a multicenter, single-arm phase II trial assessing the  
6 efficacy and safety of panitumumab and irinotecan in NeoRAS WT mCRC patients.  
7 The overall trial scheme is illustrated in Fig. 1.  
8  
9

## 10 **Patient**

11  
12 Key eligibility criteria are: 1) RAS MT (KRAS/NRAS exon 2,3,4) and BRAF V600E  
13 WT mCRC initially diagnosed in the tumor tissue; 2) refractory or intolerant to  
14 fluoropyrimidine, oxaliplatin, and irinotecan; 3) RAS WT in ctDNA (mutant allele  
15 frequencies of all RAS  $\leq 0.1\%$ ) within 28 days prior to enrollment; 4) an Eastern  
16 Cooperative Oncology Group performance status  $\leq 2$ ; and 5) a preserved organ  
17 function. Details of the eligibility criteria are presented in Table 1.  
18  
19  
20  
21  
22  
23  
24  
25  
26  
27  
28  
29  
30  
31  
32  
33  
34  
35  
36  
37  
38  
39  
40  
41  
42  
43  
44  
45  
46  
47  
48  
49  
50  
51  
52  
53  
54  
55  
56  
57  
58  
59  
60



**Table 1 Eligibility criteria for the C-PROWESS trial**

| Inclusion criteria                                                                                                                                                                                                                                                                                                                                                                                                                                         |
|------------------------------------------------------------------------------------------------------------------------------------------------------------------------------------------------------------------------------------------------------------------------------------------------------------------------------------------------------------------------------------------------------------------------------------------------------------|
| 1) Histologically proven diagnosis of colorectal adenocarcinoma                                                                                                                                                                                                                                                                                                                                                                                            |
| 2) Advanced or recurrent colorectal cancer (excluding appendix and anal canal cancer)                                                                                                                                                                                                                                                                                                                                                                      |
| 3) RAS mutation (MT) (KRAS/NRAS exon 2, 3, or 4 MT) confirmed by tumor histology prior to first-line chemotherapy                                                                                                                                                                                                                                                                                                                                          |
| 4) Confirmation of refractory or intolerant to previous treatments with chemotherapies including fluoropyrimidines, oxaliplatin, or irinotecan (irinotecan is applied to refractory only), regardless of prior treatment with trifluridine tipiracil hydrochloride, regorafenib, or angiogenesis inhibitors                                                                                                                                                |
| 5) Confirmation of the RAS WT within 28 days from test result date by ctDNA analysis using the OncoBEAM (TM) RAS CRC KIT                                                                                                                                                                                                                                                                                                                                   |
| 6) At least one measurable lesion according to RECIST version 1.1 criteria evaluated by CT or MRI within 28 days before registration                                                                                                                                                                                                                                                                                                                       |
| 7) Eastern Cooperative Oncology Group (ECOG) performance status $\leq 2$                                                                                                                                                                                                                                                                                                                                                                                   |
| 8) Age $\geq 20$ years                                                                                                                                                                                                                                                                                                                                                                                                                                     |
| 9) Adequate organ functions (bone marrow, liver, renal functions) as defined by the following laboratory values obtained within 15 days prior to the study enrollment:<br>a. Absolute neutrophil count $\geq 1500/mm^3$ b. Platelets $\geq 75000/mm^3$<br>c. Serum total bilirubin $\leq 1.5$ mg/dL<br>d. Serum AST(GOT) and ALT(GPT) $\leq 100$ U/L (except for patients with tumor involvement of the liver who must have AST and ALT $\leq 200$ U/L)    |
| 10) A life expectancy of at least 60 days                                                                                                                                                                                                                                                                                                                                                                                                                  |
| 11) Written Informed consent                                                                                                                                                                                                                                                                                                                                                                                                                               |
| Exclusion criteria                                                                                                                                                                                                                                                                                                                                                                                                                                         |
| 1) Evidence of BRAF V600E MT by tumor histology                                                                                                                                                                                                                                                                                                                                                                                                            |
| 2) Treated with blood transfusion, blood products, or hematopoietic factor products such as Granulocyte Colony Stimulating Factor within 7 days prior to enrollment in this study                                                                                                                                                                                                                                                                          |
| 3) A history of severe drug hypersensitivity or severe drug allergy                                                                                                                                                                                                                                                                                                                                                                                        |
| 4) Active infection (fever of 38 degree or higher due to infection)                                                                                                                                                                                                                                                                                                                                                                                        |
| 5) Ascites, pleural effusion, or pericardial effusion requiring continuous drainage                                                                                                                                                                                                                                                                                                                                                                        |
| 6) Uncontrolled diabetes mellitus                                                                                                                                                                                                                                                                                                                                                                                                                          |
| 7) Uncontrolled hypertension                                                                                                                                                                                                                                                                                                                                                                                                                               |
| 8) Patients who have been treated with any of the following treatments prior to starting study drug:<br>a. Extensive surgery $\leq 4$ weeks prior to starting study drug (e.g., surgical treatment with organ resection, excluding colostomy) b. Proctocolectomy $\leq 2$ weeks prior to starting the study drug<br>c. Any chemotherapy $\leq 2$ weeks prior to starting the study drug<br>d. Radiotherapy $\leq 2$ weeks prior to starting the study drug |
| 9) Clinically significant electrocardiographic abnormality or clinically significant cardiovascular accidents within 6 months prior to study enrollment, including myocardial infarction, severe unstable angina, or New York Heart Association functional classification class III or IV congestive heart failure                                                                                                                                         |
| 10) Patients with severe lung disease (interstitial pneumonia, pulmonary fibrosis, severe emphysema)                                                                                                                                                                                                                                                                                                                                                       |
| 11) History of clinically significant mental disorder or central nervous system disorder                                                                                                                                                                                                                                                                                                                                                                   |
| 12) Symptomatic brain metastasis or clinically suspected brain metastasis upon symptoms                                                                                                                                                                                                                                                                                                                                                                    |
| 13) Diarrhea that interferes with daily life                                                                                                                                                                                                                                                                                                                                                                                                               |
| 14) Intestinal paralysis, intestinal obstruction                                                                                                                                                                                                                                                                                                                                                                                                           |
| 15) Co-existing active malignancies                                                                                                                                                                                                                                                                                                                                                                                                                        |
| 16) Pregnant or lactating women; women of childbearing potential or men with women partners of childbearing potential who are unwilling to use a highly effective method of contraception or avoid intercourse during and upon completion of the study                                                                                                                                                                                                     |
| 17) Patients who have been assessed by the site physician as inappropriate for this study                                                                                                                                                                                                                                                                                                                                                                  |
| 18) Patients who have been treated with EGFR inhibitors prior to starting the study drug                                                                                                                                                                                                                                                                                                                                                                   |

## Treatment

Patients will receive panitumumab at 6 mg/kg and irinotecan at 150 mg/m<sup>2</sup> biweekly until progressive disease, unacceptable toxicity, withdrawal of informed consent, or death. The starting dose of irinotecan can be reduced to 120 mg/m<sup>2</sup> according to UGT1A1 status (homozygosity/double heterozygosity).

## Outcomes and statistical considerations

The primary endpoint of the C-PROWESS trial is a response rate (RR), defined as the proportion of patients who achieve a complete or partial response by the investigator's assessment. The secondary endpoints include PFS, overall survival (OS), a disease control rate, and incidences of adverse events. The response is evaluated according to the Response Evaluation Criteria in Solid Tumors (RECIST) version 1.1, using computed tomography at 6 and 12 weeks after the start of the protocol treatment and repeated every 8 weeks thereafter. The RR threshold is set at 4%, according to the results of previous clinical trials with TAS102 (+ bevacizumab)[24-26] or regorafenib.[27] The required sample size is 30, whereas an RR of 15% is deemed to be promising (one-sided  $\alpha = 0.10$ ;  $\beta = 0.2$ ). The primary endpoint is planned to be analyzed in all the patients that receive at least one dose of the protocol treatment and who satisfy all the inclusion and exclusion criteria. All the statistical analyses will be performed using the SAS software, version 9.2 (SAS Institute).

## Biomarker analysis

Samples for liquid biopsies are planned to be collected at baseline and after discontinuation of the protocol treatment (Fig. 1). The ctDNA will be analyzed using a highly sensitive digital polymerase chain reaction method, the OncoBEAM RAS CRC kit, and targeted next-generation sequencing, Guardant360. The OncoBEAM RAS CRC kit, which has been approved in Japan to detect RAS mutations in the ctDNA derived from mCRC, detects 34 mutations in KRAS/NRAS codons 12, 13, 59, 61, 117, and 146 in plasma.[28] Guardant360, which is a hybrid capture-based next-generation sequencing panel of the ctDNA developed by Guardant Health, detects other gene alterations.[29] Exploratory analyses will be performed to identify the proportion of patients without RAS and other mutations related to resistance to anti-EGFR inhibitors (defined as "True Neo RAS WT"). The clinical outcomes (RR, PFS, OS, and disease control rate) of true Neo RAS WT patients receiving panitumumab and irinotecan combination therapy will be compared to

1  
2  
3  
4  
5 those of patients without true Neo RAS WT and the overall study population.  
6 Moreover, the clinical outcomes will be compared according to the presence or  
7 absence of each genetic and epigenetic abnormality using exome sequencing and  
8 immunohistochemical staining in tissue samples and in ctDNA analysis before and  
9 after treatment with the protocol treatment using NGS, to explore the relationship  
10 with clinical outcomes and the mechanism of resistance.  
11  
12  
13

### 14 **Trial organization**

15  
16 Eight core high volume centers in Japan participated in this trial.  
17  
18

### 19 **Clinical Questions**

20  
21 The clinical questions to be addressed in this study will be the definition of NeoRAS  
22 WT mCRC and the therapeutic effect of EGFR inhibitors on NeoRAS WT mCRC.  
23  
24

25 First, because “Neo RAS WT” mCRC is currently defined by RAS MT status  
26 evaluated only in the tissue, it is not possible to determine whether the RAS MT has  
27 completely disappeared or missed. Therefore, we will perform more sensitive  
28 analysis using an NGS of the ctDNA before administering the protocol treatment to  
29 confirm the incidence of Neo RAS patients. If the proportion of true Neo RAS WT  
30 mCRC cases is clarified, they will be a target of new treatment strategy with EGFR  
31 inhibitors.  
32  
33  
34

35 Second, our trial will evaluate the relationship between gene mutations other than  
36 RAS in ctDNA and the efficacy of EGFR inhibitors in NeoRAS WT mCRC. The  
37 ORR, PFS, and OS may differ according to the presence or absence of some  
38 genetic abnormality that may lead to primary resistance to EGFR inhibitors such as  
39 EGFR extracellular domain, Erb-B2 Receptor Tyrosine kinase 2,  
40 Phosphatidylinositol-4,5-Bisphosphate 3-Kinase Catalytic Subunit alpha, among  
41 others, in the ctDNA (NGS) prior to protocol treatment.  
42  
43  
44

45 In addition, we plan to measure the ctDNA RAS again after the administration of the  
46 protocol treatment. This will allow us to understand how frequently RAS MT  
47 reappears after treatment and whether the same RAS MT reappear or different  
48 variants of RAS MT newly appear. If the same RAS increases after the  
49 administration of treatment, it may be due to tissue heterogeneity in which dominant  
50 clones with/without RAS mutation in tumors is changed by an EGFR inhibitor.  
51 Furthermore, the mechanism of resistance will be clarified.  
52  
53  
54  
55  
56  
57  
58  
59  
60

## Summary

Our trial will evaluate the efficacy of panitumumab and irinotecan in patients with NeoRAS WT mCRC. Moreover, developing personalized therapeutic regimens based on the ctDNA results will be a breakthrough in developing treatments for other cancers.

## Patient and public involvement statement

No patient involved.

## Acknowledgements

We thank the independent data monitoring committee (Atsushi Sato, Yasuo Hamamoto, and Hidekazu Kuramochi) and data managers (Yumiko Izoe, Tomoko Sanada, Hitomi Hannan, and Yuki Horiike).

## Authors' contributions

HO, AT, KK, NB, KY, and ES, as task managers, participated in the coordination of this trial, the design and writing of the protocol, data collection, data analysis, data interpretation, and writing of the manuscript. AT, YK, DN, MS, DT, KO, RS, KO, and TW as the protocol preparation committee, participated in this trial, including design and writing of the protocol, data collection, data analysis, data interpretation, and preparation of the manuscript. NI, as the chief of statistical analysis, participated in the statistical setting of the trial, design, and data analysis. All the authors have reviewed and approved the final manuscript.

## Funding

This research received no specific grant from any funding agency in the public, commercial or not-for-profit sectors.

## Competing interests:

Dr. Kensei Yamaguchi has received honoraria from Daiichi-Sankyo.

## Availability of data and materials

Not applicable.

## References

- 1 Pylayeva-Gupta Y, Grabocka E, Bar-Sagi D. RAS oncogenes: weaving a tumorigenic web. *Nat Rev Cancer* 2011;11:761–74.
- 2 Richman SD, Seymour MT, Chambers P, et al. KRAS and BRAF mutations in advanced colorectal cancer are associated with poor prognosis but do not preclude benefit from oxaliplatin or irinotecan: results from the MRC FOCUS trial. *J Clin Oncol* 2009;27:5931–7.
- 3 Cremolini C, Loupakis F, Antoniotti C, et al. FOLFOXIRI plus bevacizumab versus FOLFIRI plus bevacizumab as first-line treatment of patients with metastatic colorectal cancer: updated overall survival and molecular subgroup analyses of the open-label, phase 3 TRIBE study. *Lancet Oncol* 2015;16:1306–15.
- 4 Van Cutsem E, Köhne CH, Hitre E, et al. Cetuximab and chemotherapy as initial treatment for metastatic colorectal cancer. *N Engl J Med* 2009;360:1408–17.
- 5 Karapetis CS, Khambata-Ford S, Jonker DJ, et al. K-ras mutations and benefit from cetuximab in advanced colorectal cancer. *N Engl J Med* 2008;359:1757–65.
- 6 Douillard JY, Siena S, Cassidy J, et al. Randomized, phase III trial of panitumumab with infusional fluorouracil, leucovorin, and oxaliplatin (FOLFOX4) versus FOLFOX4 alone as first-line treatment in patients with previously untreated metastatic colorectal cancer: the PRIME study. *J Clin Oncol* 2010;28:4697–705.
- 7 Loupakis F, Ruzzo A, Cremolini C, et al. KRAS codon 61, 146 and BRAF mutations predict resistance to cetuximab plus irinotecan in KRAS codon 12 and 13 wild-type metastatic colorectal cancer. *Br J Cancer* 2009;101:715–21.
- 8 Allegra CJ, Rumble RB, Hamilton SR, et al. Extended ras gene mutation testing in metastatic colorectal carcinoma to predict response to anti-epidermal growth factor receptor monoclonal antibody therapy: American Society of Clinical Oncology provisional clinical opinion Update 2015. *J Clin Oncol* 2016;34:179–85.
- 9 De Roock W, Claes B, Bernasconi D, et al. Effects of KRAS, BRAF, NRAS, and PIK3CA mutations on the efficacy of cetuximab plus chemotherapy in chemotherapy-refractory metastatic colorectal cancer: a retrospective consortium analysis. *Lancet Oncol* 2010;11:753–62.
- 10 Schirripa M, Cremolini C, Loupakis F, et al. Role of NRAS mutations as prognostic and predictive markers in metastatic colorectal cancer. *Int J Cancer*

2015;136:83–90.

11 Benson AB, 3rd, Venook AP, Cederquist L, et al. *Colon cancer*, version 1.2017, NCCN Clinical Practice Guidelines in Oncology. *J Natl Compr Canc Netw* 2017;15:370–98.

12 Yoshino T, Arnold D, Taniguchi H, et al. Pan-Asian adapted ESMO consensus guidelines for the management of patients with metastatic colorectal cancer: a JSMO-ESMO initiative endorsed by CSCO, KACO, MOS, SSO and TOS. *Ann Oncol* 2018;29:44–70.

13 Hashiguchi Y, Muro K, Saito Y, et al. Japanese Society for Cancer of the Colon and Rectum (JSCCR) guidelines 2019 for the treatment of colorectal cancer. *Int J Clin Oncol* 2020;25:1–42.

14 Gazzaniga P, Raimondi C, Urbano F et al. EGFR inhibitor as second-line therapy in a patient with mutant RAS metastatic colorectal cancer: circulating tumor DNA to personalize treatment. *JCO Precis Oncol* 2018;2:1–6.

15 Sugimachi K, Sakimura S, Kuramitsu S, et al. Serial mutational tracking in surgically resected locally advanced colorectal cancer with neoadjuvant chemotherapy. *Br J Cancer* 2018;119:419–23.

16 Li W, Qiu T, Guo L et al. Major challenges related to tumor biological characteristics in accurate mutation detection of colorectal cancer by next-generation sequencing. *Cancer Lett* 2017;410:92–9.

17 Raimondi C, Nicolazzo C, Belardinilli F, et al. Transient disappearance of RAS mutant clones in plasma: A counterintuitive clinical use of EGFR inhibitors in RAS mutant metastatic colorectal cancer. *Cancers (Basel)* 2019;11.

18 Moati E, Blons H, Taly V, et al. Plasma clearance of RAS mutation under therapeutic pressure is a rare event in metastatic colorectal cancer. *Int J Cancer* 2020;147:1185–9.

19 Henry J, Willis J, Parseghian CM, et al. NeoRAS: incidence of RAS reversion from RAS mutated to RAS wild type. *J Clin Oncol* 2020;38:180.

20 Fernández Montes A, Martínez Lago N, De la Cámara Gómez J, et al. FOLFIRI plus panitumumab as second-line treatment in mutated RAS metastatic colorectal cancer patients who converted to wild type RAS after receiving first-line FOLFOX/CAPOX plus bevacizumab-based treatment: Phase II CONVERTIX trial. *Ann Oncol* 2019;30:iv23–4.

21 Sunakawa Y, Nakamura M, Ishizaki M, et al. RAS mutations in circulating tumor DNA and clinical outcomes of rechallenge treatment with anti-EGFR antibodies in patients with metastatic colorectal cancer. *JCO Precis Oncol* 2020;4:898–911.

22 Nicolazzo C, Barault L, Caponnetto S, et al. Circulating methylated DNA to



1  
2  
3  
4  
5  
6 monitor the dynamics of RAS mutation clearance in plasma from metastatic  
7 colorectal cancer patients. *Cancers (Basel)* 2020;12.

8 23 Bouchahda M, Saffroy R, Karaboué A, et al. Undetectable RAS-mutant  
9 clones in plasma: possible implication for anti-EGFR therapy and prognosis in  
10 patients with RAS-mutant metastatic colorectal cancer. *JCO Precis Oncol*  
11 2020;4:1070–9.

12  
13 24 Mayer RJ, Van Cutsem E, Falcone A, et al. Randomized trial of TAS-102  
14 for refractory metastatic colorectal cancer. *N Engl J Med* 2015;372:1909–19.

15 25 Kuboki Y, Nishina T, Shinozaki E, et al. TAS-102 plus bevacizumab for  
16 patients with metastatic colorectal cancer refractory to standard therapies (C-TASK  
17 FORCE): an investigator-initiated, open-label, single-arm, multicentre, phase 1/2  
18 study. *Lancet Oncol* 2017;18:1172–81.

19  
20 26 Pfeiffer P, Yilmaz M, Möller S, et al. TAS-102 with or without bevacizumab  
21 in patients with chemorefractory metastatic colorectal cancer: an  
22 investigator-initiated, open-label, randomised, phase 2 trial. *Lancet Oncol*  
23 2020;21:412–20.

24  
25 27 Grothey A, Van Cutsem E, Sobrero A, et al. Regorafenib monotherapy for  
26 previously treated metastatic colorectal cancer (CORRECT): an international,  
27 multicentre, randomised, placebo-controlled, phase 3 trial. *Lancet* 2013;381:303–  
28 12.

29  
30 28 Diehl F, Schmidt K, Durkee KH, et al. Analysis of mutations in DNA  
31 isolated from plasma and stool of colorectal cancer patients. *Gastroenterology*  
32 2008;135:489–98.

33  
34 29 Odegaard JI, Vincent JJ, Mortimer S, et al. Validation of a plasma-based  
35 comprehensive cancer genotyping assay utilizing orthogonal tissue- and plasma-based  
36 methodologies. *Clin Cancer Res* 2018;24:3539–49.

### 37 38 39 40 41 42 43 **Figure legend**

44  
45  
46  
47 Fig. 1 Overall trial scheme.

48  
49 Liquid biopsies for the OncoBEAM RAS CRC kit and Guardant360 will be  
50 performed at baseline, and the OncoBEAM RAS CRC kit will be used after the  
51 discontinuation of the protocol treatment.  
52  
53  
54  
55  
56  
57  
58

1  
2  
3  
4  
5 OncoBEAM: OncoBEAM RAS CRC kit; \*Substitution of results immediately before  
6 enrollment.  
7  
8  
9  
10  
11  
12  
13  
14  
15  
16  
17  
18  
19  
20  
21  
22  
23  
24  
25  
26  
27  
28  
29  
30  
31  
32  
33  
34  
35  
36  
37  
38  
39  
40  
41  
42  
43  
44  
45  
46  
47  
48  
49  
50  
51  
52  
53  
54  
55  
56  
57  
58  
59  
60

For peer review only



# Overall Trial Scheme

1  
2  
3  
4  
5  
6  
7  
8  
9  
10  
11  
12  
13  
14  
15  
16  
17  
18  
19  
20  
21  
22  
23  
24  
25  
26  
27  
28  
29  
30

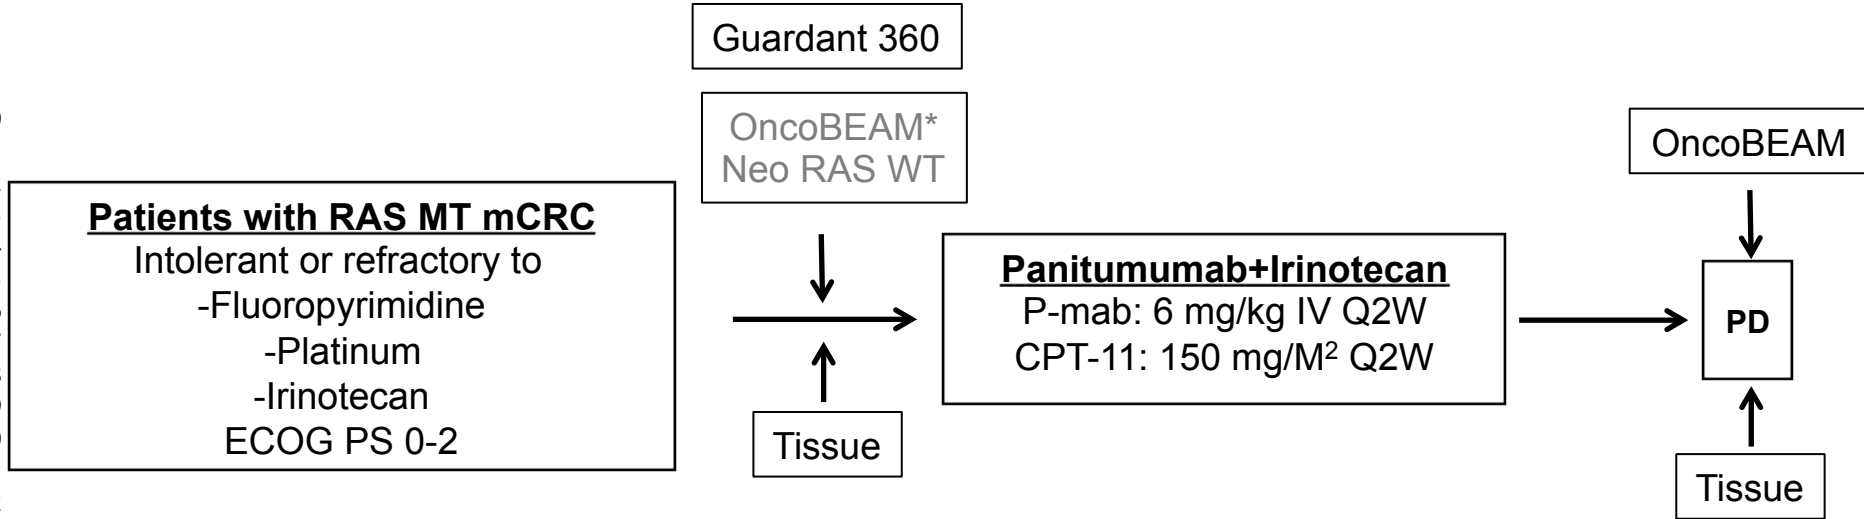

# BMJ Open

## Study protocol for a multicenter single-arm phase II trial evaluating the safety and efficacy of panitumumab and irinotecan in patients with NeORAS wild-type metastatic colorectal cancer (C-PROWESS trial)

|                                 |                                                                                                                                                                                                                                                                                                                                                                                                                                                                                                                                                                                                                                                                                                                                                                                                                                                                                                                                                                                                                                                                                                                                                                                                                                                                                                                                                                            |
|---------------------------------|----------------------------------------------------------------------------------------------------------------------------------------------------------------------------------------------------------------------------------------------------------------------------------------------------------------------------------------------------------------------------------------------------------------------------------------------------------------------------------------------------------------------------------------------------------------------------------------------------------------------------------------------------------------------------------------------------------------------------------------------------------------------------------------------------------------------------------------------------------------------------------------------------------------------------------------------------------------------------------------------------------------------------------------------------------------------------------------------------------------------------------------------------------------------------------------------------------------------------------------------------------------------------------------------------------------------------------------------------------------------------|
| Journal:                        | <i>BMJ Open</i>                                                                                                                                                                                                                                                                                                                                                                                                                                                                                                                                                                                                                                                                                                                                                                                                                                                                                                                                                                                                                                                                                                                                                                                                                                                                                                                                                            |
| Manuscript ID                   | bmjopen-2022-063071.R1                                                                                                                                                                                                                                                                                                                                                                                                                                                                                                                                                                                                                                                                                                                                                                                                                                                                                                                                                                                                                                                                                                                                                                                                                                                                                                                                                     |
| Article Type:                   | Protocol                                                                                                                                                                                                                                                                                                                                                                                                                                                                                                                                                                                                                                                                                                                                                                                                                                                                                                                                                                                                                                                                                                                                                                                                                                                                                                                                                                   |
| Date Submitted by the Author:   | 31-May-2022                                                                                                                                                                                                                                                                                                                                                                                                                                                                                                                                                                                                                                                                                                                                                                                                                                                                                                                                                                                                                                                                                                                                                                                                                                                                                                                                                                |
| Complete List of Authors:       | Osumi, Hiroki; Cancer Institute Hospital Gastroenterology Center, Department of Gastroenterology<br>Ishizuka, Naoki; Cancer Institute Hospital Gastroenterology Center, Department of Clinical Trial Planning and Management<br>Takashima, Atsuo; National Cancer Center Japan, Department of Gastrointestinal Medical Oncology<br>Kumekawa, Yosuke; Saitama Cancer Center, Division of Gastrointestinal Oncology<br>Nakano, Daisuke; Tokyo Metropolitan Cancer and Infectious Diseases Center Komagome Hospital, Department of Surgery<br>Shiozawa, Manabu; Kanagawa Cancer Center, Department of Surgery<br>Denda, Tadamichi; Chiba Cancer Center, Division of Gastroenterology<br>Sawada, Ryoichi; Jikei University Hospital, Division of Gastroenterology and Hepatology<br>Ouchi, Kota; Tohoku University Hospital, Department of Medical Oncology<br>Wakatsuki, Takeru; Cancer Institute Hospital Gastroenterology Center, Department of Gastroenterology<br>Narikazu, Boku; The University of Tokyo, Department of Medical Oncology and General Medicine<br>Kato, K; National Cancer Center Hospital, Department of Gastrointestinal Medical Oncology<br>Yamaguchi, Kensei; Cancer Institute Hospital Gastroenterology Center, Department of Gastroenterology<br>Shinozaki, Eiji; Cancer Institute Hospital Gastroenterology Center, Department of Gastroenterology |
| <b>Primary Subject Heading</b>: | Oncology                                                                                                                                                                                                                                                                                                                                                                                                                                                                                                                                                                                                                                                                                                                                                                                                                                                                                                                                                                                                                                                                                                                                                                                                                                                                                                                                                                   |
| Secondary Subject Heading:      | Gastroenterology and hepatology                                                                                                                                                                                                                                                                                                                                                                                                                                                                                                                                                                                                                                                                                                                                                                                                                                                                                                                                                                                                                                                                                                                                                                                                                                                                                                                                            |
| Keywords:                       | CHEMOTHERAPY, Gastrointestinal tumours < GASTROENTEROLOGY, Gastrointestinal tumours < ONCOLOGY                                                                                                                                                                                                                                                                                                                                                                                                                                                                                                                                                                                                                                                                                                                                                                                                                                                                                                                                                                                                                                                                                                                                                                                                                                                                             |
|                                 |                                                                                                                                                                                                                                                                                                                                                                                                                                                                                                                                                                                                                                                                                                                                                                                                                                                                                                                                                                                                                                                                                                                                                                                                                                                                                                                                                                            |

1  
2  
3  
4  
5  
6  
7  
8  
9  
10  
11  
12  
13  
14  
15  
16  
17  
18  
19  
20  
21  
22  
23  
24  
25  
26  
27  
28  
29  
30  
31  
32  
33  
34  
35  
36  
37  
38  
39  
40  
41  
42  
43  
44  
45  
46  
47  
48  
49  
50  
51  
52  
53  
54  
55  
56  
57  
58  
59  
60

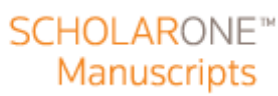

1  
2  
3  
4  
5  
6 **1 Study Protocol**

7  
8 **2 Study protocol for a multicenter single-arm phase II trial evaluating the safety**  
9 **3 and efficacy of panitumumab and irinotecan in patients with NeoRAS wild-**  
10 **4 type metastatic colorectal cancer (C-PROWESS trial)**  
11  
12 **5**

13  
14 6 Hiroki Osumi<sup>1</sup>, Naoki Ishizuka<sup>2</sup>, Atsuo Takashima<sup>3</sup>, Yosuke Kumekawa<sup>4</sup>, Daisuke  
15 7 Nakano<sup>5</sup>, Manabu Shiozawa<sup>6</sup>, Tadamichi Denda<sup>7</sup>, Ryoichi Sawada<sup>8</sup>, Kota Ouchi<sup>9</sup>,  
16 8 Takeru Wakatsuki<sup>1</sup>, Narikazu Boku<sup>10</sup>, Ken Kato<sup>3</sup>, Kensei, Yamaguchi<sup>1</sup>, Eiji  
17 9 Shinozaki<sup>1</sup>

18  
19  
20 10 <sup>1</sup>Department of Gastroenterology, The Cancer Institute Hospital of the Japanese  
21 11 Foundation for Cancer Research, Tokyo, Japan.

22  
23 12 <sup>2</sup>Department of Clinical Trial Planning and Management, The Cancer Institute  
24 13 Hospital of the Japanese Foundation for Cancer Research, Tokyo, Japan.

25  
26  
27 14  
28  
29 15 <sup>3</sup>Department of Gastrointestinal Medical Oncology, National Cancer Center  
30 16 Hospital, Tokyo, Japan.

31  
32 17  
33  
34 18 <sup>4</sup>Division of Gastrointestinal Oncology, Saitama Cancer Center, Saitama, Japan.

35  
36  
37 19  
38  
39 20 <sup>5</sup>Department of Surgery, Tokyo Metropolitan Cancer and Infectious Diseases  
40 21 Center Komagome Hospital, Tokyo, Japan.

41  
42 22  
43 23 <sup>6</sup>Department of Surgery, Kanagawa Cancer Center, Yokohama, Japan.

44  
45  
46 24  
47  
48 25 <sup>7</sup>Division of Gastroenterology, Chiba Cancer Center, Chiba, Japan.

49  
50 26  
51  
52 27 <sup>8</sup>Division of Gastroenterology and Hepatology, Department of Internal Medicine,  
53  
54 28 The Jikei University School of Medicine, Tokyo, Japan.

1

2<sup>9</sup>Department of Medical Oncology, Tohoku University Hospital, Miyagi, Japan.

3

4<sup>10</sup>Department of Medical Oncology and General Medicine, IMSUT Hospital,  
5 Institute of Medical Science, University of Tokyo, Tokyo, Japan.

6

**Corresponding author:**

Eiji Shinozaki, M.D., Ph.D.

Department of Gastroenterology, Cancer Institute Hospital, Japanese Foundation  
for Cancer Research, 3-8-31 Ariake, Koto-ku, Tokyo 135-8550, Japan

Phone: +81-3-3520-0111

Fax: +81-3-3570-0515

E-mail: [eiji.shinozaki@jfcrr.or.jp](mailto:eiji.shinozaki@jfcrr.or.jp)

Word count = 2082 (excluding title page, abstract, references, and figures)

## 1 ABSTRACT

2 **Introduction:** A new concept of “NeoRAS wild-type (WT),” which means conversion  
3 of RAS status from RAS mutant to RAS WT after treatment, has been reported.  
4 Previous observational and proof-of-concept studies have demonstrated the efficacy  
5 of epidermal growth factor receptor inhibitors in patients with NeoRAS WT metastatic  
6 colorectal cancer (mCRC). Moreover, post hoc biomarker analyses of these studies  
7 have suggested that not only the RAS status in the circulating tumor DNA (ctDNA)  
8 but also other gene mutational status may be useful as biomarkers of epidermal  
9 growth factor receptor inhibitors for NeoRAS WT mCRC.

10 **Methods and analysis:** This trial is a multicenter, single-arm, phase II trial to assess  
11 the efficacy and safety of panitumumab plus irinotecan therapy for patients with  
12 NeoRAS mCRC. The key eligibility criteria include RAS mutant mCRC initially  
13 proven in tumor tissue refractory or intolerant to fluoropyrimidine, oxaliplatin, and  
14 irinotecan; RAS WT in ctDNA (defined as plasma mutant allele frequencies of all  
15 RAS  $\leq 0.1\%$ ) within 28 days before enrollment; and Eastern Cooperative Oncology  
16 Group performance status  $\leq 2$ . The primary endpoint is the response rate. The target  
17 sample size is 30 patients. Biomarker analyses are planned to be performed using  
18 next-generation sequencing-based ctDNA analysis.

19 **Ethics and dissemination:** This study was approved by the certified review board  
20 of National Cancer Center Hospital. The main results of the trial will be presented in  
21 international meetings and in medical journals.

22  
23 **Trial registration:** jRCT, s031210565. Registration date, January 20, 2022.

24 **Keywords:** Metastatic colorectal cancer, Circulating tumor DNA, Liquid biopsy,  
25 NeoRAS, EGFR inhibitor

26

### 27 **Strengths and limitations of this study**

- 28 • The C-PROWESS trial is a prospective multicenter, single-arm, phase II
- 29 trial.
- 30 • The trial is designed to assess the efficacy and safety of panitumumab plus
- 31 irinotecan therapy in patients with NeoRAS
- 32 • However, no comparator is a limitation.

1  
2  
3  
4  
5  
6  
7  
8  
9  
10  
11  
12  
13  
14  
15  
16  
17  
18  
19  
20  
21  
22  
23  
24  
25  
26  
27  
28  
29  
30  
31  
32  
33  
34  
35  
36  
37  
38  
39  
40  
41  
42  
43  
44  
45  
46  
47  
48  
49  
50  
51  
52  
53  
54  
55  
56  
57  
58  
59  
60

- Translational Research of biomarkers using liquid biopsies at baseline and after discontinuation of the treatment is planned to be performed.

For peer review only

1

2

### 3 INTRODUCTION

4 RAS mutations (MTs) induce the activation of the protein kinase pathway and  
5 promote carcinogenesis and cancer growth.<sup>1</sup> Patients with RAS MT metastatic  
6 colorectal cancer (mCRC) have a poorer prognosis than those with RAS wild-type  
7 (WT) mCRC.<sup>2,3</sup> Epidermal growth factor receptor (EGFR) inhibitors (such as  
8 cetuximab and panitumumab), which are key drugs for mCRC, are ineffective for  
9 patients with RAS MT mCRC (KRAS/NRAS exons 2, 3, and 4).<sup>4-10</sup>

10 International guidelines recommend RAS genetic testing prior to the administration  
11 of an EGFR inhibitor in patients with mCRC.<sup>11-13</sup> Repeat biopsies are not performed  
12 in routine clinical practice to monitor the RAS MT status;<sup>11-13</sup> the consistency of the  
13 RAS MT status before and after chemotherapy remains unclear.

14 Recent advances in diagnostic technology for the detection of genetic mutations by  
15 liquid biopsy, especially circulating tumor DNA (ctDNA), have made minimally  
16 invasive, simple, and repeatable testing possible.<sup>14-16</sup> It is well known that RAS  
17 status can change before and after treatment. First reported was the identification of  
18 RAS MTs in ctDNA in EGFR inhibitor-resistant RAS WT mCRC patients.<sup>17,18</sup> This  
19 involved acquired resistance to EGFR inhibitors, and several clinical trials have  
20 reported that re-measuring the RAS status before treatment is an important predictor  
21 of treatment efficacy when considering EGFR inhibitor re-challenge.<sup>19, 20, 21</sup>

22 On the other hand, there have been some reports that RAS MT observed at the initial  
23 diagnosis converted to RAS WT after treatment.<sup>22</sup> These cases have been called  
24 "NeoRAS WT" mCRC.<sup>22</sup> The incidence of NeoRAS WT mCRC has been reported to  
25 range from 10.7% to 40% when assessed in tumor tissue samples,<sup>23, 24</sup> and from  
26 18.8% to 83.3% in the circulating tumor DNA (ctDNA).<sup>25-31</sup>

27 There have been several reports of the use of EGFR inhibitors in patients with  
28 NeoRAS WT. Mohamed et al., in a proof-of-concept study of EGFR inhibitors in  
29 patients with NeoRAS WT,<sup>31</sup> reported that the objective response rate was 55.6%  
30 and progression-free survival (PFS) was 9 months in patients with NeoRAS WT  
31 mCRC treated with fluorouracil, folinic acid, irinotecan, and cetuximab.<sup>31</sup> This result  
32 suggested that EGFR inhibitors may be effective in patients with NeoRAS WT mCRC.



1 Although retrospective analyses and proof-of-concept studies have indicated the  
 2 potential efficacy of EGFR inhibitors in NeoRAS WT mCRC,<sup>22, 31</sup> the safety and  
 3 efficacy have not been validated prospectively. Furthermore, the definition of  
 4 NeoRAS WT mCRC has not been established.

5 Therefore, this trial will evaluate the efficacy of panitumumab and irinotecan in  
 6 patients with NeoRAS WT mCRC confirmed in ctDNA after prior treatment.

7

## 8 **METHODS AND ANALYSIS**

### 9 **Trial design**

10 This trial is a multicenter, single-arm, phase II trial to investigate the safety and  
 11 efficacy of Panitumumab and iRinOtecan in NeoRAS **W**ild type mEtaStatic  
 12 colorectal cancer patient**S** (C-PROWESS trial). The overall trial scheme is illustrated  
 13 in Fig. 1.

### 14 **Patients**

15 The key eligibility criteria are as follows: 1) RAS MT (KRAS/NRAS exon 2,3,4) and  
 16 BRAF V600E WT mCRC initially diagnosed in the tumor tissue; 2) refractory or  
 17 intolerant to fluoropyrimidine, oxaliplatin, and irinotecan; 3) RAS WT in ctDNA  
 18 (mutant allele frequencies of all RAS  $\leq$  0.1%) within 28 days prior to enrollment; 4)  
 19 an Eastern Cooperative Oncology Group performance status  $\leq$  2; and 5) preserved  
 20 organ function. The details of the eligibility criteria are presented in Table 1.

**Table 1 Eligibility criteria for the C-PROWESS trial**

---

#### Inclusion criteria

---

- 1) Histologically proven diagnosis of colorectal adenocarcinoma
- 2) Advanced or recurrent colorectal cancer (excluding appendix and anal canal cancer)
- 3) RAS mutation (MT) (KRAS/NRAS exon 2, 3, or 4 MT) confirmed by tumor histology prior to first-line chemotherapy

- 4) Confirmation of refractoriness or intolerance to previous treatments with chemotherapy, including fluoropyrimidines, oxaliplatin, or irinotecan (irinotecan is applied to refractory disease only), regardless of prior treatment with trifluridine tipiracil hydrochloride, regorafenib, or angiogenesis inhibitors
- 5) Confirmation of the RAS WT within 28 days from the test result date by ctDNA analysis using the OncoBEAM™ RAS CRC KIT
- 6) At least one measurable lesion according to the RECIST version 1.1 criteria evaluated by CT or MRI within 28 days before registration
- 7) Eastern Cooperative Oncology Group (ECOG) performance status  $\leq 2$
- 8) Age  $\geq 20$  years
- 9) Adequate organ function (bone marrow, liver, renal function) as defined by the following laboratory values obtained within 15 days prior to enrollment in the study:
  - a. Absolute neutrophil count  $\geq 1500/\text{mm}^3$
  - b. Platelets  $\geq 75000/\text{mm}^3$
  - c. Serum total bilirubin  $\leq 1.5 \text{ mg/dL}$ ; Serum AST(GOT) and ALT(GPT)  $\leq 100 \text{ U/L}$  (except for patients with tumor involvement of the liver who must have AST and ALT  $\leq 200 \text{ U/L}$ )
- 10) A life expectancy of at least 60 days
- 11) Written informed consent

---

#### Exclusion criteria

---

- 1) Evidence of BRAF V600E MT by tumor histology
- 2) Treated with blood transfusion, blood products, or hematopoietic factor products such as Granulocyte Colony Stimulating Factor within 7 days prior to enrollment in this study
- 3) A history of severe drug hypersensitivity or severe drug allergy
- 4) Active infection (fever of  $38^\circ\text{C}$  or higher due to infection)
- 5) Ascites, pleural effusion, or pericardial effusion requiring continuous drainage
- 6) Uncontrolled diabetes mellitus
- 7) Uncontrolled hypertension
- 8) Patients who have been treated with any of the following treatments prior to starting the study drug:
  - a. Extensive surgery  $\leq 4$  weeks prior to starting the study drug (e.g., surgical treatment with organ resection, excluding colostomy)
  - b. Proctocolectomy  $\leq 2$  weeks prior to starting the study drug
  - c. Any chemotherapy  $\leq 2$  weeks prior to starting the study drug
  - d. Radiotherapy  $\leq 2$  weeks prior to starting the study drug

- 9) Clinically significant electrocardiographic abnormality or clinically significant cardiovascular accidents within 6 months prior to study enrollment, including myocardial infarction, severe unstable angina, or New York Heart Association functional classification class III or IV congestive heart failure
  - 10) Patients with severe lung disease (interstitial pneumonia, pulmonary fibrosis, or severe emphysema)
  - 11) History of clinically significant mental disorder or central nervous system disorder
  - 12) Symptomatic brain metastasis or clinically suspected brain metastasis upon symptoms
  - 13) Diarrhea that interferes with daily life
  - 14) Intestinal paralysis, intestinal obstruction
  - 15) Co-existing active malignancies
  - 16) Pregnant or lactating women; women of childbearing potential or men with female partners of childbearing potential who are unwilling to use a highly effective method of contraception or avoid intercourse during and upon completion of the study
  - 17) Patients who have been assessed by the site physician as inappropriate for this study
  - 18) Patients who have been treated with EGFR inhibitors prior to starting the study drug
- 

1

## 2 **Treatment**

3 Patients will receive panitumumab at 6 mg/kg and irinotecan at 150 mg/m<sup>2</sup>  
4 biweekly until progressive disease, unacceptable toxicity, withdrawal of informed  
5 consent, or death. The starting dose of irinotecan can be reduced to 120 mg/m<sup>2</sup>  
6 according to UGT1A1 status (homozygosity/double heterozygosity).

7

## 8 **Outcomes and statistical considerations**

9 The primary endpoint of the C-PROWESS trial is response rate (RR), defined as the  
10 proportion of patients who achieve complete or partial response by the investigator's  
11 assessment. The secondary endpoints include PFS, overall survival (OS), disease  
12 control rate, incidences of adverse events, and the ratio of Neo RAS WT mCRC after  
13 failure of fluoropyrimidines, oxaliplatin, and irinotecan. The response is evaluated  
14 according to the Response Evaluation Criteria in Solid Tumors (RECIST) version 1.1,  
15 using computed tomography at 6 and 12 weeks after the start of the protocol  
16 treatment and repeated every 8 weeks thereafter. The RR threshold is set at 4%,

1 according to the results of previous clinical trials with tipiracil/trifluridine (+  
2 bevacizumab)<sup>32-34</sup> or regorafenib.<sup>35</sup> The required sample size is 30, whereas an RR  
3 of 15% is deemed to be promising (one-sided  $\alpha = 0.10$ ;  $\beta = 0.2$ ). The primary  
4 endpoint is planned to be analyzed in all the patients that receive at least one dose  
5 of the protocol treatment and who satisfy all the inclusion and exclusion criteria.  
6 Participant enrolment started on 1 February 2022 and will end on 31 January 2023.  
7

## 8 **Biomarker analysis**

9 Samples for liquid biopsies are planned to be collected at baseline and after  
10 discontinuation of the protocol treatment (Fig. 1). The ctDNA will be analyzed using  
11 a highly sensitive digital polymerase chain reaction method, the OncoBEAM RAS  
12 CRC kit, and targeted next-generation sequencing, Guardant360. The OncoBEAM  
13 RAS CRC kit, which has been approved in Japan to detect RAS mutations in the  
14 ctDNA derived from mCRC, detects 34 mutations in KRAS/NRAS codons 12, 13, 59,  
15 61, 117, and 146 in plasma.<sup>36</sup> Guardant360, a hybrid capture-based next-generation  
16 sequencing panel of the ctDNA developed by Guardant Health, detects other gene  
17 alterations.<sup>37</sup> Exploratory analyses will be performed to identify the proportion of  
18 patients without RAS and other mutations related to resistance to anti-EGFR  
19 inhibitors (defined as “True NeoRAS WT”). The clinical outcomes (RR, PFS, OS,  
20 and disease control rate) of patients with true NeoRAS WT receiving panitumumab  
21 and irinotecan combination therapy will be compared to those of patients without true  
22 NeoRAS WT and the overall study population. Moreover, the clinical outcomes will  
23 be compared according to the presence or absence of each genetic and epigenetic  
24 abnormality using exome sequencing and immunohistochemical staining in tissue  
25 samples and in ctDNA analysis before and after treatment with the protocol  
26 treatment using NGS, to explore the relationship with clinical outcomes and the  
27 mechanism of resistance.

## 28 **Trial organization**

29 Eight core high-volume centers in Japan will participate in this trial.

## 30 **Ethics and dissemination**

31  
32 This study was approved by the certified review board of the national cancer center  
33 hospital (jRCT, s031210565; Registration date, January 20, 2022.). The main results  
34 of the trial will be presented in international meetings and in medical journals.

## 1 **Clinical Questions**

2 The clinical questions to be addressed in this study will be the definition of NeoRAS  
3 WT mCRC and the therapeutic effect of EGFR inhibitors on NeoRAS WT mCRC.

4 First, when “NeoRAS WT” mCRC is defined by RAS MT status only, it is not possible  
5 to determine whether the RAS MT has completely disappeared or has not been  
6 measured due to a low volume of ctDNA. Therefore, we will perform NGS analysis  
7 using ctDNA before administering the protocol treatment to confirm the incidence of  
8 “True NeoRAS WT” mCRC patients. “True NeoRAS WT” mCRC is defined as the  
9 disappearance of RAS and the detection of other genetic mutations after treatment.  
10 If the proportion of “True NeoRAS WT” mCRC patients is clarified, it may be even  
11 more useful in the enrichment of the population that will respond to treatment with  
12 EGFR inhibitors.

13 Second, our trial will evaluate the relationship between gene mutations other than  
14 RAS in ctDNA and the efficacy of EGFR inhibitors in NeoRAS WT mCRC. The ORR,  
15 PFS, and OS may differ according to the presence or absence of some genetic  
16 abnormality that may lead to primary resistance to EGFR inhibitors, such as EGFR  
17 extracellular domain, Erb-B2 Receptor Tyrosine kinase 2, Phosphatidylinositol-4,5-  
18 Bisphosphate 3-Kinase Catalytic Subunit alpha, among others, in the ctDNA (NGS)  
19 prior to protocol treatment.

20 In addition, we plan to measure the ctDNA RAS again after the administration of the  
21 protocol treatment. This will allow us to understand how frequently RAS MT  
22 reappears after treatment and whether the same RAS MT reappears or different  
23 variants of RAS MT newly appear. If the same RAS variant allele frequency  
24 increases after the administration of treatment, it may be due to tissue heterogeneity  
25 in which dominant clones with/out RAS mutation in tumors are changed by an EGFR  
26 inhibitor. Furthermore, the mechanism of resistance to EGFR inhibitors will be  
27 clarified.

## 28 **Limitations**

29 The limitations of this study are the small sample size and lack of a control arm.

## 30 **Summary**

1 Our trial will evaluate the efficacy of panitumumab and irinotecan in patients with  
2 NeoRAS WT mCRC to develop personalized therapeutic regimens based on the  
3 ctDNA results.

#### 4 **Patient and public involvement statement**

5 No patient involvement.

#### 7 **Acknowledgments**

8 We thank the independent data monitoring committee (Atsushi Sato, Yasuo  
9 Hamamoto, and Hidekazu Kuramochi) and the data managers (Yumiko Izoe,  
10 Tomoko Sanada, Hitomi Hannan, and Yuki Horiike).

#### 11 **Authors' contributions**

12 HO, AT, KK, NB, KY, and ES, as task managers, participated in the coordination of  
13 this trial, the design and the writing of the protocol, data collection, data analysis,  
14 data interpretation, and writing of the manuscript. AT, YK, DN, MS, DT, KO, RS,  
15 KO, and TW, as the protocol preparation committee, participated in this trial,  
16 including design and writing of the protocol, data collection, data analysis, data  
17 interpretation, and preparation of the manuscript. NI, as the chief of statistical  
18 analysis, participated in the statistical setting of the trial, design, and data analysis.  
19 All the authors have reviewed and approved the final manuscript.

#### 20 **Funding**

21 This research received no specific grant from any funding agency in the public,  
22 commercial, or not-for-profit sectors.

#### 24 **Competing interests:**

25 Dr. Kensei Yamaguchi has received honoraria from Daiichi-Sankyo.

#### 27 **Availability of data and materials**

28 Not applicable.



1

2

3

### References

[1] Pylayeva-Gupta Y, Grabocka E, Bar-Sagi D. RAS oncogenes: weaving a tumorigenic web. *Nat Rev Cancer*. 2011; 11: 761-74.

[2] Richman SD, Seymour MT, Chambers P, et al. KRAS and BRAF mutations in advanced colorectal cancer are associated with poor prognosis but do not preclude benefit from oxaliplatin or irinotecan: results from the MRC FOCUS trial. *J Clin Oncol*. 2009; 27: 5931-7.

[3] Cremolini C, Loupakis F, Antoniotti C, et al. FOLFOXIRI plus bevacizumab versus FOLFIRI plus bevacizumab as first-line treatment of patients with metastatic colorectal cancer: updated overall survival and molecular subgroup analyses of the open-label, phase 3 TRIBE study. *Lancet Oncol*. 2015; 16: 1306-15.

[4] Van Cutsem E, Köhne CH, Hitre E, et al. Cetuximab and chemotherapy as initial treatment for metastatic colorectal cancer. *N Engl J Med*. 2009; 360: 1408-17.

[5] Karapetis CS, Khambata-Ford S, Jonker DJ, et al. K-ras mutations and benefit from cetuximab in advanced colorectal cancer. *N Engl J Med*. 2008; 359: 1757-65.

[6] Douillard JY, Siena S, Cassidy J, et al. Randomized, phase III trial of panitumumab with infusional fluorouracil, leucovorin, and oxaliplatin (FOLFOX4) versus FOLFOX4 alone as first-line treatment in patients with previously untreated metastatic colorectal cancer: the PRIME study. *J Clin Oncol*. 2010; 28: 4697-705.

[7] Loupakis F, Ruzzo A, Cremolini C, et al. KRAS codon 61, 146 and BRAF mutations predict resistance to cetuximab plus irinotecan in KRAS codon 12 and 13 wild-type metastatic colorectal cancer. *Br J Cancer*. 2009; 101: 715-21.

[8] Allegra CJ, Rumble RB, Hamilton SR, et al. Extended RAS Gene Mutation Testing in Metastatic Colorectal Carcinoma to Predict Response to Anti-Epidermal Growth Factor Receptor Monoclonal Antibody Therapy: American Society of Clinical Oncology Provisional Clinical Opinion Update 2015. *J Clin Oncol*. 2016; 34: 179-85.

[9] De Roock W, Claes B, Bernasconi D, et al. Effects of KRAS, BRAF, NRAS, and PIK3CA mutations on the efficacy of cetuximab plus chemotherapy in chemotherapy-refractory metastatic colorectal cancer: a retrospective consortium analysis. *Lancet Oncol*. 2010; 11: 753-62.

[10] Schirripa M, Cremolini C, Loupakis F, et al. Role of NRAS mutations as prognostic and predictive markers in metastatic colorectal cancer. *Int J Cancer*. 2015; 136: 83-90.

[11] Benson AB, 3rd, Venook AP, Cederquist L, et al. Colon Cancer, Version 1.2017, NCCN Clinical Practice Guidelines in Oncology. *Journal of the National Comprehensive Cancer Network* : JNCCN. 2017; 15: 370-98.

[12] Yoshino T, Arnold D, Taniguchi H, et al. Pan-Asian adapted ESMO consensus guidelines for the management of patients with metastatic colorectal

- 1 cancer: a JSMO-ESMO initiative endorsed by CSCO, KACO, MOS, SSO and TOS.  
2 *Ann Oncol.* 2018; 29: 44-70.
- 3 [13] Hashiguchi Y, Muro K, Saito Y, et al. Japanese Society for Cancer of the  
4 Colon and Rectum (JSCCR) guidelines 2019 for the treatment of colorectal cancer.  
5 *Int J Clin Oncol.* 2020; 25: 1-42.
- 6 [14] Siravegna G, Marsoni S, Siena S, Bardelli A. Integrating liquid biopsies into  
7 the management of cancer. *Nat Rev Clin Oncol.* 2017; 14: 531-48.
- 8 [15] Wan JCM, Massie C, Garcia-Corbacho J, et al. Liquid biopsies come of  
9 age: towards implementation of circulating tumour DNA. *Nature reviews Cancer.*  
10 2017; 17: 223-38.
- 11 [16] Osumi H, Shinozaki E, Yamaguchi K, Zembutsu H. Clinical utility of  
12 circulating tumor DNA for colorectal cancer. *Cancer Sci.* 2019; 110: 1148-55.
- 13 [17] Misale S, Yaeger R, Hobor S, et al. Emergence of KRAS mutations and  
14 acquired resistance to anti-EGFR therapy in colorectal cancer. *Nature.* 2012; 486:  
15 532-6.
- 16 [18] Siravegna G, Mussolin B, Buscarino M, et al. Clonal evolution and  
17 resistance to EGFR blockade in the blood of colorectal cancer patients. *Nat Med.*  
18 2015; 21: 795-801.
- 19 [19] Cremolini C, Rossini D, Dell'Aquila E, et al. Rechallenge for Patients With  
20 RAS and BRAF Wild-Type Metastatic Colorectal Cancer With Acquired Resistance  
21 to First-line Cetuximab and Irinotecan: A Phase 2 Single-Arm Clinical Trial. *JAMA*  
22 *Oncol.* 2018.
- 23 [20] Sartore-Bianchi A, Pietrantonio F, Lonardi S, et al. Phase II study of anti-  
24 EGFR rechallenge therapy with panitumumab driven by circulating tumor DNA  
25 molecular selection in metastatic colorectal cancer: The CHRONOS trial. *J Clin*  
26 *Oncol.* 2021; 39: 3506.
- 27 [21] Osawa H, Shinozaki E, Nakamura M, et al. Phase II study of cetuximab  
28 rechallenge in patients with ras wild-type metastatic colorectal cancer: E-rechallenge  
29 trial. *Annals of Oncology.* 2018; 29: viii161.
- 30 [22] Gazzaniga P, Raimondi C, Urbano F, Cortesi E. EGFR Inhibitor as Second-  
31 Line Therapy in a Patient With Mutant RAS Metastatic Colorectal Cancer: Circulating  
32 Tumor DNA to Personalize Treatment. *JCO Precis Oncol.* 2018: 1-6.
- 33 [23] Sugimachi K, Sakimura S, Kuramitsu S, et al. Serial mutational tracking in  
34 surgically resected locally advanced colorectal cancer with neoadjuvant  
35 chemotherapy. *Br J Cancer.* 2018; 119: 419-23.
- 36 [24] Li W, Qiu T, Guo L, Ying J. Major challenges related to tumor biological  
37 characteristics in accurate mutation detection of colorectal cancer by next-  
38 generation sequencing. *Cancer Lett.* 2017; 410: 92-9.
- 39 [25] Raimondi C, Nicolazzo C, Belardinilli F, et al. Transient Disappearance of  
40 RAS Mutant Clones in Plasma: A Counterintuitive Clinical Use of EGFR Inhibitors in  
41 RAS Mutant Metastatic Colorectal Cancer. *Cancers (Basel).* 2019; 11.
- 42 [26] Moati E, Blons H, Taly V, et al. Plasma clearance of RAS mutation under  
43 therapeutic pressure is a rare event in metastatic colorectal cancer. *Int J Cancer.*  
44 2020; 147: 1185-9.



1  
2  
3  
4  
5  
6  
7  
8  
9  
10  
11  
12  
13  
14  
15  
16  
17  
18  
19  
20  
21  
22  
23  
24  
25  
26  
27  
28  
29  
30  
31  
32  
33  
34  
35  
36  
37  
38  
39  
40  
41  
42  
43  
44  
45  
46  
47  
48  
49  
50  
51  
52  
53  
54  
55  
56  
57  
58  
59  
60

- [27] Henry J, Willis J, Parseghian CM, et al. NeoRAS: Incidence of RAS reversion from RAS mutated to RAS wild type. *J Clin Oncol*. 2020; 38: 180.
- [28] Fernández Montes A, Martínez Lago N, De la Cámara Gómez J, et al. FOLFIRI plus panitumumab as second-line treatment in mutated RAS metastatic colorectal cancer patients who converted to wild type RAS after receiving first-line FOLFOX/CAPOX plus bevacizumab-based treatment: Phase II CONVERTIX trial. *Ann Oncol*. 2019; 30: iv23-iv4.
- [29] Sunakawa Y, Nakamura M, Ishizaki M, et al. RAS Mutations in Circulating Tumor DNA and Clinical Outcomes of Rechallenge Treatment With Anti-EGFR Antibodies in Patients With Metastatic Colorectal Cancer. *JCO Precis Oncol*. 2020: 898-911.
- [30] Nicolazzo C, Barault L, Caponnetto S, et al. Circulating Methylated DNA to Monitor the Dynamics of RAS Mutation Clearance in Plasma from Metastatic Colorectal Cancer Patients. *Cancers (Basel)*. 2020; 12.
- [31] Bouchahda M, Saffroy R, Karaboué A, et al. Undetectable RAS-Mutant Clones in Plasma: Possible Implication for Anti-EGFR Therapy and Prognosis in Patients With RAS-Mutant Metastatic Colorectal Cancer. *JCO Precis Oncol*. 2020: 1070-9.
- [32] Mayer RJ, Van Cutsem E, Falcone A, et al. Randomized trial of TAS-102 for refractory metastatic colorectal cancer. *N Engl J Med*. 2015; 372: 1909-19.
- [33] Kuboki Y, Nishina T, Shinozaki E, et al. TAS-102 plus bevacizumab for patients with metastatic colorectal cancer refractory to standard therapies (C-TASK FORCE): an investigator-initiated, open-label, single-arm, multicentre, phase 1/2 study. *Lancet Oncol*. 2017; 18: 1172-81.
- [34] Pfeiffer P, Yilmaz M, Möller S, et al. TAS-102 with or without bevacizumab in patients with chemorefractory metastatic colorectal cancer: an investigator-initiated, open-label, randomised, phase 2 trial. *Lancet Oncol*. 2020; 21: 412-20.
- [35] Grothey A, Van Cutsem E, Sobrero A, et al. Regorafenib monotherapy for previously treated metastatic colorectal cancer (CORRECT): an international, multicentre, randomised, placebo-controlled, phase 3 trial. *Lancet*. 2013; 381: 303-12.
- [36] Diehl F, Schmidt K, Durkee KH, et al. Analysis of mutations in DNA isolated from plasma and stool of colorectal cancer patients. *Gastroenterology*. 2008; 135: 489-98.
- [37] Odegaard JI, Vincent JJ, Mortimer S, et al. Validation of a Plasma-Based Comprehensive Cancer Genotyping Assay Utilizing Orthogonal Tissue- and Plasma-Based Methodologies. *Clin Cancer Res*. 2018; 24: 3539-49.

1  
2  
3  
4  
5 1  
6  
7

8 2  
9

10 3 **Figure legend**  
11 4

12  
13  
14 5 Fig. 1 Overall trial scheme.  
15

16 6 Liquid biopsies for the OncoBEAM RAS CRC kit and Guardant360 will be  
17 7 performed at baseline, and the OncoBEAM RAS CRC kit will be used after the  
18 8 discontinuation of the protocol treatment.  
19

20  
21 9 OncoBEAM: OncoBEAM RAS CRC kit; \*Substitution of results immediately before  
22 10 enrollment.  
23  
24  
25 11

# Overall Trial Scheme

1  
2  
3  
4  
5  
6  
7  
8  
9  
10  
11  
12  
13  
14  
15  
16  
17  
18  
19  
20  
21  
22  
23  
24  
25  
26  
27  
28  
29  
30

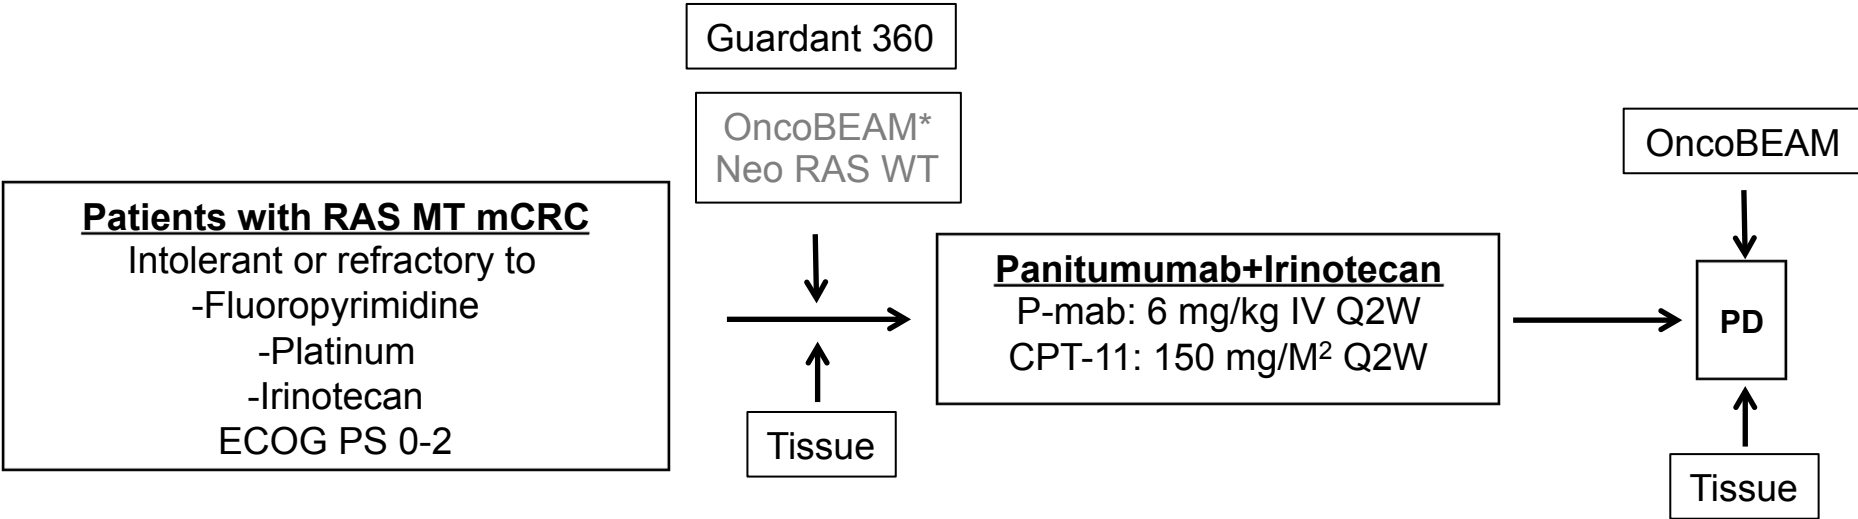

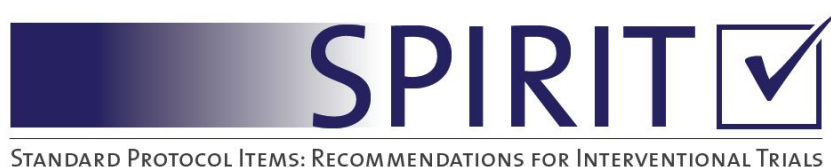

SPIRIT 2013 Checklist: Recommended items to address in a clinical trial protocol and related documents\*

| Section/item                      | Item No | Description                                                                                                                                                                                                                                                                                               |
|-----------------------------------|---------|-----------------------------------------------------------------------------------------------------------------------------------------------------------------------------------------------------------------------------------------------------------------------------------------------------------|
| <b>Administrative information</b> |         |                                                                                                                                                                                                                                                                                                           |
| Title                             | 1       | Descriptive title identifying the study design, population, interventions, and, if applicable, trial acronym (Page1, Line 2-4)                                                                                                                                                                            |
| Trial registration                | 2a      | Trial identifier and registry name. If not yet registered, name of intended registry (Page3, Line 23)                                                                                                                                                                                                     |
|                                   | 2b      | All items from the World Health Organization Trial Registration Data Set                                                                                                                                                                                                                                  |
| Protocol version                  | 3       | Date and version identifier                                                                                                                                                                                                                                                                               |
| Funding                           | 4       | Sources and types of financial, material, and other support (Page11, Line 18-19)                                                                                                                                                                                                                          |
| Roles and responsibilities        | 5a      | Names, affiliations, and roles of protocol contributors (Page11, Line 9-16)                                                                                                                                                                                                                               |
|                                   | 5b      | Name and contact information for the trial sponsor (No involvement)                                                                                                                                                                                                                                       |
|                                   | 5c      | Role of study sponsor and funders, if any, in study design; collection, management, analysis, and interpretation of data; writing of the report; and the decision to submit the report for publication, including whether they will have ultimate authority over any of these activities (No involvement) |
|                                   | 5d      | Composition, roles, and responsibilities of the coordinating centre, steering committee, endpoint adjudication committee, data management team, and other individuals or groups overseeing the trial, if applicable (see Item 21a for data monitoring committee) (Page11, Line 5-7)                       |
| <b>Introduction</b>               |         |                                                                                                                                                                                                                                                                                                           |
| Background and rationale          | 6a      | Description of research question and justification for undertaking the trial, including summary of relevant studies (published and unpublished) examining benefits and harms for each intervention (Page 5, Line 2-33, Page 6, Line 1-4)                                                                  |
|                                   | 6b      | Explanation for choice of comparators (No comparator)                                                                                                                                                                                                                                                     |
| Objectives                        | 7       | Specific objectives or hypotheses (Page 6, Line 3-4)                                                                                                                                                                                                                                                      |

1  
2 Trial design 8 Description of trial design including type of trial (eg, parallel group,  
3 crossover, factorial, single group), allocation ratio, and framework (eg,  
4 superiority, equivalence, noninferiority, exploratory) (Page 6, Line 8-  
5 11)  
6  
7

### 8 **Methods: Participants, interventions, and outcomes**

9  
10 Study setting 9 Description of study settings (eg, community clinic, academic hospital)  
11 and list of countries where data will be collected. Reference to where  
12 list of study sites can be obtained (Page 9, Line 25)  
13

14 Eligibility criteria 10 Inclusion and exclusion criteria for participants. If applicable, eligibility  
15 criteria for study centres and individuals who will perform the  
16 interventions (eg, surgeons, psychotherapists) (Table1)  
17  
18

19 Interventions 11a Interventions for each group with sufficient detail to allow replication,  
20 including how and when they will be administered  
21

22 11b Criteria for discontinuing or modifying allocated interventions for a  
23 given trial participant (eg, drug dose change in response to harms,  
24 participant request, or improving/worsening disease)  
25

26 11c Strategies to improve adherence to intervention protocols, and any  
27 procedures for monitoring adherence (eg, drug tablet return,  
28 laboratory tests)  
29

30 11d Relevant concomitant care and interventions that are permitted or  
31 prohibited during the trial  
32  
33

34 Outcomes 12 Primary, secondary, and other outcomes, including the specific  
35 measurement variable (eg, systolic blood pressure), analysis metric  
36 (eg, change from baseline, final value, time to event), method of  
37 aggregation (eg, median, proportion), and time point for each  
38 outcome. Explanation of the clinical relevance of chosen efficacy and  
39 harm outcomes is strongly recommended (Page 8, Line 9-21, Page 9,  
40 Line 1)  
41  
42

43 Participant 13 Time schedule of enrolment, interventions (including any run-ins and  
44 timeline washouts), assessments, and visits for participants. A schematic  
45 diagram is highly recommended (see Figure) (Page 9, Line 1-2)  
46  
47

48 Sample size 14 Estimated number of participants needed to achieve study objectives  
49 and how it was determined, including clinical and statistical  
50 assumptions supporting any sample size calculations (Page 9, Line  
51 17-20)  
52  
53

54 Recruitment 15 Strategies for achieving adequate participant enrolment to reach  
55 target sample size  
56

### 57 **Methods: Assignment of interventions (for controlled trials)**

58 Allocation:  
59  
60

|    |                |     |                                                                         |
|----|----------------|-----|-------------------------------------------------------------------------|
| 1  |                |     |                                                                         |
| 2  | Sequence       | 16a | Method of generating the allocation sequence (eg, computer-             |
| 3  | generation     |     | generated random numbers), and list of any factors for stratification.  |
| 4  |                |     | To reduce predictability of a random sequence, details of any planned   |
| 5  |                |     | restriction (eg, blocking) should be provided in a separate document    |
| 6  |                |     | that is unavailable to those who enrol participants or assign           |
| 7  |                |     | interventions                                                           |
| 8  |                |     |                                                                         |
| 9  |                |     |                                                                         |
| 10 | Allocation     | 16b | Mechanism of implementing the allocation sequence (eg, central          |
| 11 | concealment    |     | telephone; sequentially numbered, opaque, sealed envelopes),            |
| 12 | mechanism      |     | describing any steps to conceal the sequence until interventions are    |
| 13 |                |     | assigned                                                                |
| 14 |                |     |                                                                         |
| 15 | Implementation | 16c | Who will generate the allocation sequence, who will enrol participants, |
| 16 |                |     | and who will assign participants to interventions                       |
| 17 |                |     |                                                                         |
| 18 |                |     |                                                                         |
| 19 | Blinding       | 17a | Who will be blinded after assignment to interventions (eg, trial        |
| 20 | (masking)      |     | participants, care providers, outcome assessors, data analysts), and    |
| 21 |                |     | how                                                                     |
| 22 |                |     |                                                                         |
| 23 |                | 17b | If blinded, circumstances under which unblinding is permissible, and    |
| 24 |                |     | procedure for revealing a participant's allocated intervention during   |
| 25 |                |     | the trial                                                               |
| 26 |                |     |                                                                         |
| 27 |                |     |                                                                         |

### Methods: Data collection, management, and analysis

|    |                 |     |                                                                          |
|----|-----------------|-----|--------------------------------------------------------------------------|
| 28 |                 |     |                                                                          |
| 29 |                 |     |                                                                          |
| 30 | Data collection | 18a | Plans for assessment and collection of outcome, baseline, and other      |
| 31 | methods         |     | trial data, including any related processes to promote data quality (eg, |
| 32 |                 |     | duplicate measurements, training of assessors) and a description of      |
| 33 |                 |     | study instruments (eg, questionnaires, laboratory tests) along with      |
| 34 |                 |     | their reliability and validity, if known. Reference to where data        |
| 35 |                 |     | collection forms can be found, if not in the protocol                    |
| 36 |                 |     |                                                                          |
| 37 |                 |     |                                                                          |
| 38 |                 | 18b | Plans to promote participant retention and complete follow-up,           |
| 39 |                 |     | including list of any outcome data to be collected for participants who  |
| 40 |                 |     | discontinue or deviate from intervention protocols                       |
| 41 |                 |     |                                                                          |
| 42 | Data            | 19  | Plans for data entry, coding, security, and storage, including any       |
| 43 | management      |     | related processes to promote data quality (eg, double data entry;        |
| 44 |                 |     | range checks for data values). Reference to where details of data        |
| 45 |                 |     | management procedures can be found, if not in the protocol               |
| 46 |                 |     |                                                                          |
| 47 |                 |     |                                                                          |
| 48 | Statistical     | 20a | Statistical methods for analysing primary and secondary outcomes.        |
| 49 | methods         |     | Reference to where other details of the statistical analysis plan can be |
| 50 |                 |     | found, if not in the protocol (Page 8, Line 20-21)                       |
| 51 |                 |     |                                                                          |
| 52 |                 | 20b | Methods for any additional analyses (eg, subgroup and adjusted           |
| 53 |                 |     | analyses) (Page 9, Line 5-23)                                            |
| 54 |                 |     |                                                                          |
| 55 |                 | 20c | Definition of analysis population relating to protocol non-adherence     |
| 56 |                 |     | (eg, as randomised analysis), and any statistical methods to handle      |
| 57 |                 |     | missing data (eg, multiple imputation)                                   |
| 58 |                 |     |                                                                          |
| 59 |                 |     |                                                                          |
| 60 |                 |     |                                                                          |

**Methods: Monitoring**

|                                                                                                                                                                                                                      |                            |     |                                                                                                                                                                                                                                                                                                                                       |
|----------------------------------------------------------------------------------------------------------------------------------------------------------------------------------------------------------------------|----------------------------|-----|---------------------------------------------------------------------------------------------------------------------------------------------------------------------------------------------------------------------------------------------------------------------------------------------------------------------------------------|
| 1<br>2<br>3<br>4<br>5<br>6<br>7<br>8<br>9<br>10<br>11<br>12<br>13<br>14<br>15<br>16<br>17<br>18<br>19<br>20<br>21<br>22<br>23<br>24                                                                                  | <b>Methods: Monitoring</b> |     |                                                                                                                                                                                                                                                                                                                                       |
| 25<br>26<br>27<br>28<br>29<br>30<br>31<br>32<br>33<br>34<br>35<br>36<br>37<br>38<br>39<br>40<br>41<br>42<br>43<br>44<br>45<br>46<br>47<br>48<br>49<br>50<br>51<br>52<br>53<br>54<br>55<br>56<br>57<br>58<br>59<br>60 | Data monitoring            | 21a | Composition of data monitoring committee (DMC); summary of its role and reporting structure; statement of whether it is independent from the sponsor and competing interests; and reference to where further details about its charter can be found, if not in the protocol. Alternatively, an explanation of why a DMC is not needed |
|                                                                                                                                                                                                                      |                            | 21b | Description of any interim analyses and stopping guidelines, including who will have access to these interim results and make the final decision to terminate the trial                                                                                                                                                               |
|                                                                                                                                                                                                                      | Harms                      | 22  | Plans for collecting, assessing, reporting, and managing solicited and spontaneously reported adverse events and other unintended effects of trial interventions or trial conduct                                                                                                                                                     |
|                                                                                                                                                                                                                      | Auditing                   | 23  | Frequency and procedures for auditing trial conduct, if any, and whether the process will be independent from investigators and the sponsor                                                                                                                                                                                           |

**Ethics and dissemination**

|                                                                                                                                                                                                                      |                                 |     |                                                                                                                                                                                                                                  |
|----------------------------------------------------------------------------------------------------------------------------------------------------------------------------------------------------------------------|---------------------------------|-----|----------------------------------------------------------------------------------------------------------------------------------------------------------------------------------------------------------------------------------|
| 25<br>26<br>27<br>28<br>29<br>30<br>31<br>32<br>33<br>34<br>35<br>36<br>37<br>38<br>39<br>40<br>41<br>42<br>43<br>44<br>45<br>46<br>47<br>48<br>49<br>50<br>51<br>52<br>53<br>54<br>55<br>56<br>57<br>58<br>59<br>60 | <b>Ethics and dissemination</b> |     |                                                                                                                                                                                                                                  |
|                                                                                                                                                                                                                      | Research ethics approval        | 24  | Plans for seeking research ethics committee/institutional review board (REC/IRB) approval (Page 9, Line 28-29)                                                                                                                   |
|                                                                                                                                                                                                                      | Protocol amendments             | 25  | Plans for communicating important protocol modifications (eg, changes to eligibility criteria, outcomes, analyses) to relevant parties (eg, investigators, REC/IRBs, trial participants, trial registries, journals, regulators) |
|                                                                                                                                                                                                                      | Consent or assent               | 26a | Who will obtain informed consent or assent from potential trial participants or authorised surrogates, and how (see Item 32) (Table1)                                                                                            |
|                                                                                                                                                                                                                      |                                 | 26b | Additional consent provisions for collection and use of participant data and biological specimens in ancillary studies, if applicable                                                                                            |
|                                                                                                                                                                                                                      | Confidentiality                 | 27  | How personal information about potential and enrolled participants will be collected, shared, and maintained in order to protect confidentiality before, during, and after the trial                                             |
|                                                                                                                                                                                                                      | Declaration of interests        | 28  | Financial and other competing interests for principal investigators for the overall trial and each study site (Page 11, Line 22)                                                                                                 |
|                                                                                                                                                                                                                      | Access to data                  | 29  | Statement of who will have access to the final trial dataset, and disclosure of contractual agreements that limit such access for investigators                                                                                  |
|                                                                                                                                                                                                                      | Ancillary and post-trial care   | 30  | Provisions, if any, for ancillary and post-trial care, and for compensation to those who suffer harm from trial participation                                                                                                    |

- 1  
2  
3  
4  
5  
6  
7  
8  
9  
10  
11  
12  
13
- |                      |     |                                                                                                                                                                                                                                                                                     |
|----------------------|-----|-------------------------------------------------------------------------------------------------------------------------------------------------------------------------------------------------------------------------------------------------------------------------------------|
| Dissemination policy | 31a | Plans for investigators and sponsor to communicate trial results to participants, healthcare professionals, the public, and other relevant groups (eg, via publication, reporting in results databases, or other data sharing arrangements), including any publication restrictions |
|                      | 31b | Authorship eligibility guidelines and any intended use of professional writers                                                                                                                                                                                                      |
|                      | 31c | Plans, if any, for granting public access to the full protocol, participant-level dataset, and statistical code                                                                                                                                                                     |

## 14 Appendices

- 15  
16  
17  
18  
19  
20  
21  
22
- |                            |    |                                                                                                                                                                                                |
|----------------------------|----|------------------------------------------------------------------------------------------------------------------------------------------------------------------------------------------------|
| Informed consent materials | 32 | Model consent form and other related documentation given to participants and authorised surrogates (Supplemental)                                                                              |
| Biological specimens       | 33 | Plans for collection, laboratory evaluation, and storage of biological specimens for genetic or molecular analysis in the current trial and for future use in ancillary studies, if applicable |

---

23  
24  
25  
26  
27  
28  
29  
30  
31  
32  
33  
34  
35  
36  
37  
38  
39  
40  
41  
42  
43  
44  
45  
46  
47  
48  
49  
50  
51  
52  
53  
54  
55  
56  
57  
58  
59  
60

\*It is strongly recommended that this checklist be read in conjunction with the SPIRIT 2013 Explanation & Elaboration for important clarification on the items. Amendments to the protocol should be tracked and dated. The SPIRIT checklist is copyrighted by the SPIRIT Group under the Creative Commons "[Attribution-NonCommercial-NoDerivs 3.0 Unported](https://creativecommons.org/licenses/by-nc-nd/3.0/)" license.
